# Supplementary figures and images for: Opaganib Downregulates N-Myc Expression and Suppresses In Vitro and In Vivo Growth of Neuroblastoma Cells
Source: MDPI journal article supplement (doi:10.3390/cancers16091779), 2024-05-05

Figure S1 c-Myc

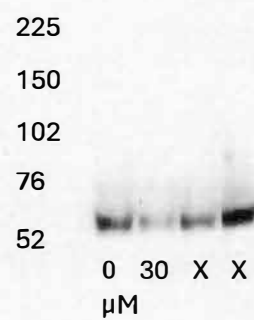

Figure S1 ERK

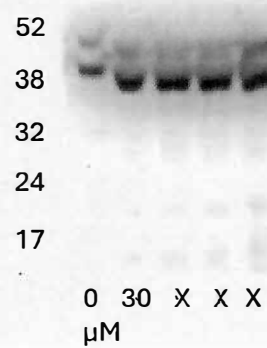

Figure S1 GAPDH

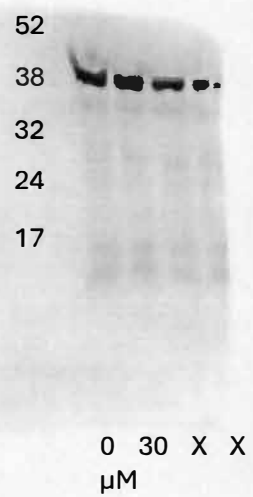

Figure S1 Mcl-1

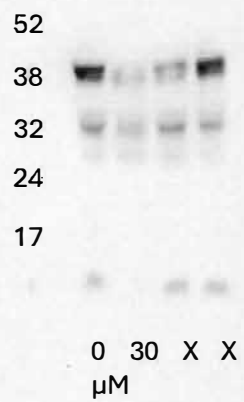

Figure S1 N-Myc

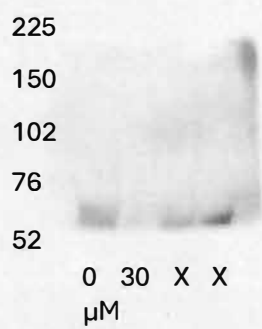

Figure S1 pERK

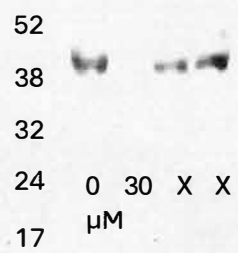

Supplement: s1 [file s1]
